# Supplementary material
Source: PubMed Central journal article supplement (PMC5014664)

175 **FIG E1. IL-1R, Myd88 and NF- $\kappa$ B expression are required for IL-13 IL-1 $\beta$ -**  
176 **dependent enhancement.**

177 **A**, “anti-IL-1, IL-1R1-“ and “IL-1 $\beta$ , IL-1R1+“ Th2 cells were reprimed under  
178 neutral, Th1 or Th2 conditions and then re-assessed for IL-4 and IL-13  
179 expression. **B**, Sorted 5C.C7 Th2 cells “anti-IL-1, IL-1R-“ or “IL-1 $\beta$ , IL-1R+“ were  
180 transferred into normal B10.A CD45.2 mice, and rechallenged intranasally with  
181 PCC + anakinra or IL-1 $\beta$  respectively. Statistical analysis of IL-4 and IL-13  
182 expression on the transferred T cells found in the lungs. **C**, OT-II, OT-II IL-1R $^{-/-}$ ,  
183 or OTII Myd88 $^{-/-}$  CD4 $^{+}$ T cells were cultured with wild type-T-depleted  
184 splenocytes under Th2 + anti-IL-1 or Th2 + IL-1 $\beta$  conditions, and then tested for  
185 IL-13 and IL-4. **D**, 5C.C7 Th2 cells were differentiated  $\pm$  anti-IL-1 $\alpha/\beta$  for 24h. NF-  
186  $\kappa$ B activation inhibitor + anti-IL-1 $\alpha/\beta$  or IL-1 $\beta$  were added and cultured for an  
187 additional 3 days.

188

189 **FIG E2. Gene expression analysis of “IL-1 $\beta$ , IL-1R+“ versus “anti-IL-1, IL-1R-**  
190 **“ groups**

191 **A**, IL-13 and IL-4 regulatory regions and map of locus with DNase I HS sites.  
192 5C.C7 Th2 cells primed with anti-IL-1 or IL-1 $\beta$  were sorted as in Fig. 1C. ChIP  
193 analysis on IL-13 and IL-4 promoter region was performed immediately. **B**, RT-  
194 PCR analyzes were performed with total RNA isolated from Th2 “anti-IL-1, IL-  
195 1R-“ and Th2 “IL-1 $\beta$ , IL-1R+“ cell cultures. Representative data presented is the  
196 ratio between both groups. **C**, cAMP functional response to biologically active  
197 PTH was measured on 24h supernatant collected from Th1, Th2 “anti-IL-1, IL-  
198 1R-“ and Th2 “IL-1 $\beta$ , IL-1R+“ cell cultures primed after 4 days and restimulated  
199 with platebound anti-CD3/CD28.

200 **D**, PTH ELISA was measured according to manufacturers’ recommendations.

201

Figure E1

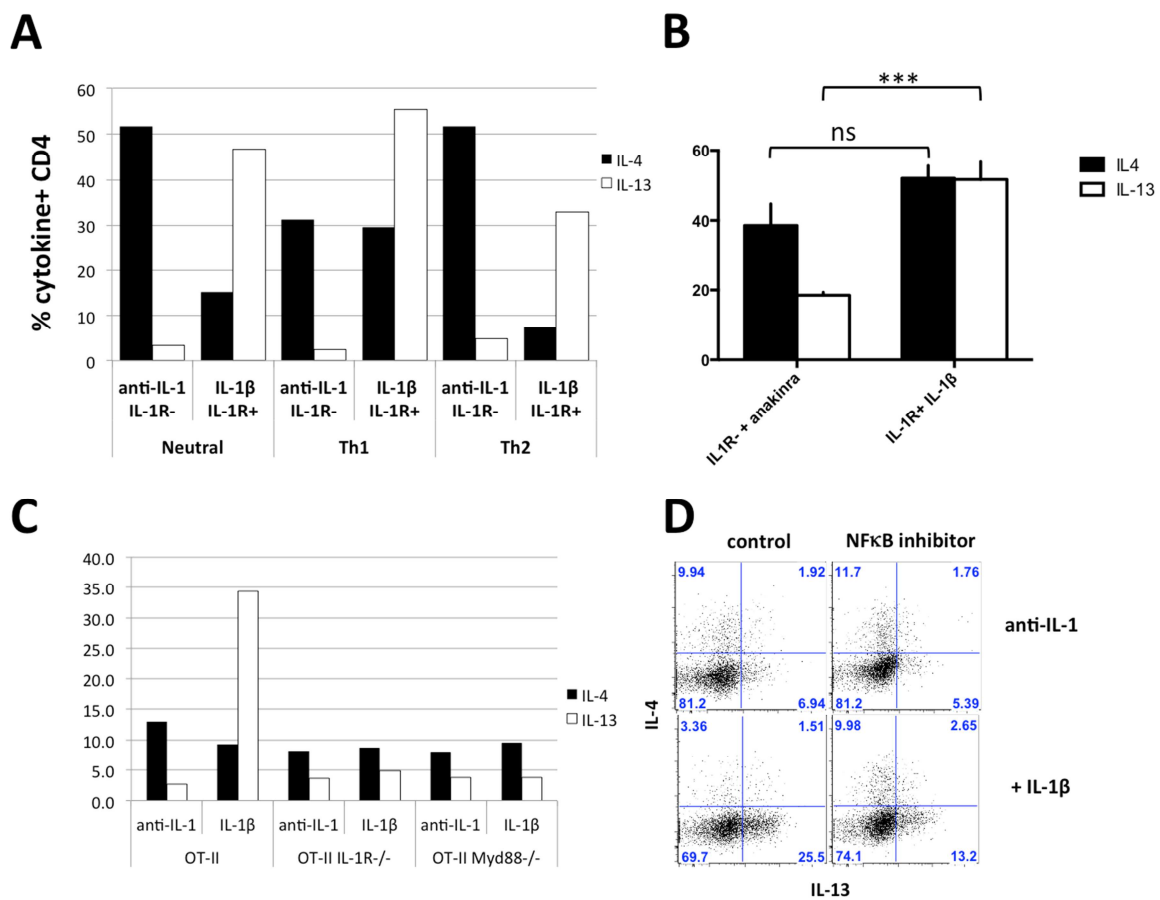

Figure E2

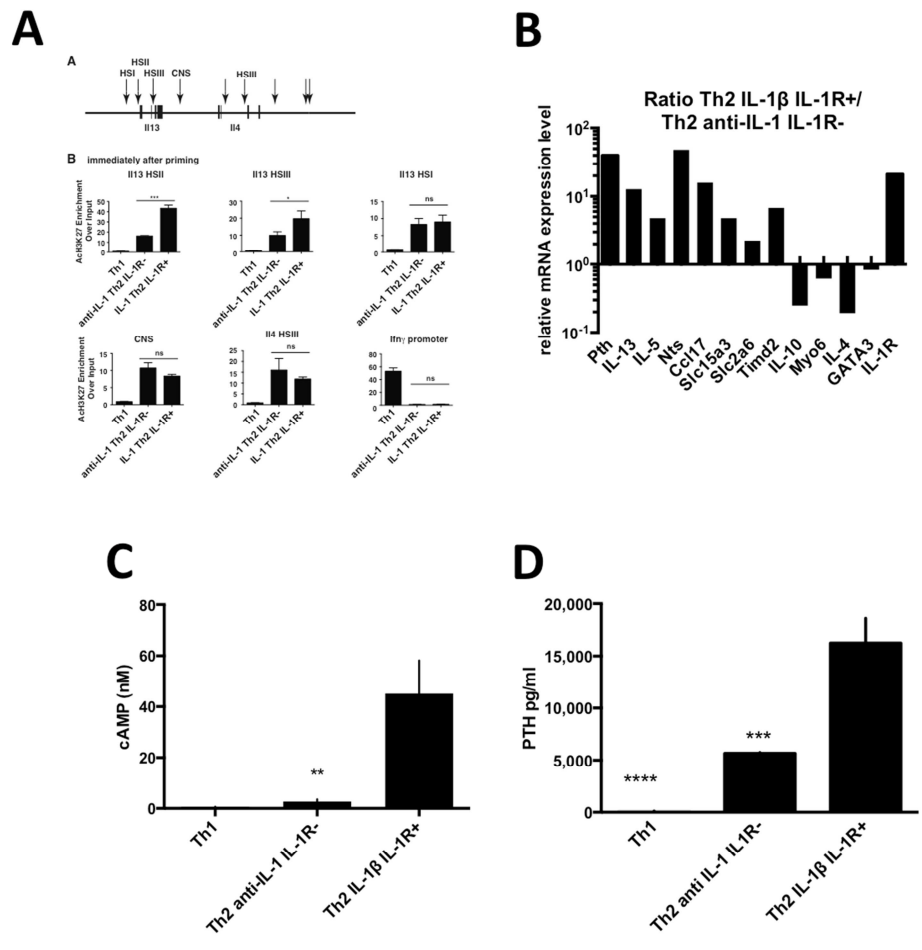

Supplement: NIHMS779638-supplement-supplement_1.pdf [file NIHMS779638-supplement-supplement_1.pdf]
